# Supplementary material for: Stability-Diversity Tradeoffs Impose Fundamental Constraints on Selection of Synthetic Human VH/VL Single-Domain Antibodies from In Vitro Display Libraries
Source: PubMed Central journal article supplement (PMC5763143; doi:10.3389/fimmu.2017.01759), 2017-12-12
Supplement: data_sheet_1.pdf [file data_sheet_1.pdf]

## Supplementary Material

### **Stability-diversity tradeoffs impose fundamental constraints on selection of synthetic human V<sub>H</sub>/V<sub>L</sub> single-domain antibodies from *in vitro* display libraries**

Kevin A. Henry<sup>1</sup>, Dae Young Kim<sup>1</sup>, Hiba Kandalafi<sup>1</sup>, Michael J. Lowden<sup>1</sup>, Qingling Yang<sup>1</sup>, Joseph D. Schrag<sup>2</sup>, Greg Hussack<sup>1</sup>, C. Roger MacKenzie<sup>1,3</sup>, and Jamshid Tanha<sup>1,3,4\*</sup>

<sup>1</sup>Human Health Therapeutics Research Centre, National Research Council Canada,  
100 Sussex Drive, Ottawa, Ontario, Canada, K1A 0R6

<sup>2</sup>Human Health Therapeutics Research Centre, National Research Council Canada,  
6100 Royalmount Avenue, Montréal, Québec, Canada, H4P 2R2

<sup>3</sup>School of Environmental Sciences, University of Guelph, 50 Stone Road East, Guelph,  
Ontario, Canada, N1G 2W1

<sup>4</sup>Department of Biochemistry, Microbiology and Immunology, University of Ottawa, 451  
Smyth Road, Ottawa, Ontario, Canada, K1H 8M5

\*Address correspondence to:

Jamshid Tanha, Ph.D.

Human Health Therapeutics Portfolio, National Research Council Canada,  
100 Sussex Drive, Ottawa, ON, Canada, K1A 0R6

Tel +1-613-990-7206 or Fax +1-613-952-9092

[jamshid.tanha@nrc-cnrc.gc.ca](mailto:jamshid.tanha@nrc-cnrc.gc.ca)

|                     | CDR-H1 (H31-H35B)              |           |                |                     |                      |                     |                |              |               |                      |                      | CDR-H2 (H50-65)      |                      |                      |                      |                      |                      |                      |                      |                      |                      |                      | CDR-H3 (H95-102)     |                      |                      |                      |                      |                      |                      |                      |                      |                      |    |     |  |  |  |
|---------------------|--------------------------------|-----------|----------------|---------------------|----------------------|---------------------|----------------|--------------|---------------|----------------------|----------------------|----------------------|----------------------|----------------------|----------------------|----------------------|----------------------|----------------------|----------------------|----------------------|----------------------|----------------------|----------------------|----------------------|----------------------|----------------------|----------------------|----------------------|----------------------|----------------------|----------------------|----------------------|----|-----|--|--|--|
|                     | FR1                            |           |                | FR2                 |                      |                     | FR3            |              |               | FR4                  |                      |                      | FR1                  |                      |                      | FR2                  |                      |                      | FR3                  |                      |                      | FR4                  |                      |                      | FR1                  |                      |                      | FR2                  |                      |                      | FR3                  |                      |    | FR4 |  |  |  |
|                     | 1                              | 2         | 3              | 4                   | 5                    | 6                   | 7              | 8            | 9             | 10                   | 11                   | 12                   | 13                   | 14                   | 15                   | 16                   | 17                   | 18                   | 19                   | 20                   | 21                   | 22                   | 23                   | 24                   | 25                   | 26                   | 27                   | 28                   | 29                   | 30                   | 31                   | 32                   | 33 |     |  |  |  |
| VH428               | 123456789012345678901234567890 | 12345     | 67890123456789 | 012abc3456789012345 | 67890123456789012345 | 6789012345678901234 | 567890abcd12   | 34567890123  | 1234567890123 | 12345678901234567890 | 12345678901234567890 | 12345678901234567890 | 12345678901234567890 | 12345678901234567890 | 12345678901234567890 | 12345678901234567890 | 12345678901234567890 | 12345678901234567890 | 12345678901234567890 | 12345678901234567890 | 12345678901234567890 | 12345678901234567890 | 12345678901234567890 | 12345678901234567890 | 12345678901234567890 | 12345678901234567890 | 12345678901234567890 | 12345678901234567890 | 12345678901234567890 | 12345678901234567890 | 12345678901234567890 | 12345678901234567890 |    |     |  |  |  |
| VH428 <sub>SS</sub> | QLQLQESGGGLVQPGGSLRLS          | CAASGFTFS | SYAMS          | WFRQAPGKGLEWVG      | FIRSKAYGGTTEYAASVKG  | RFTISRDDSKSIAYLQMN  | SLRAEDTAMYICAR | RAKDGYNSPEDY | WGQGT         | TLTVSS               |                      |                      |                      |                      |                      |                      |                      |                      |                      |                      |                      |                      |                      |                      |                      |                      |                      |                      |                      |                      |                      |                      |    |     |  |  |  |
| VH420               | QVQLVESGGGLVQPGGSLRLS          | CAASGFTFS | SYAMS          | WFRQAPGKGLEWVC      | FIRSKAYGGTTEYAASVKG  | RFTISRDDSKSIAYLQMN  | SLRAEDTAMYICAR | RAKDGYNSPEDY | WGQGT         | TLTVSS               |                      |                      |                      |                      |                      |                      |                      |                      |                      |                      |                      |                      |                      |                      |                      |                      |                      |                      |                      |                      |                      |                      |    |     |  |  |  |
| VH420 <sub>SS</sub> | QVQLVESGGGLVQPGGSLRLS          | CAASGFTFS | NAWMT          | WVRQAPGKGLEWVG      | RIKTKTDGGTTYAAPVKG   | RFTISRDDSKNTLYLQMN  | SLKTEDTAVYYCTT | DRDHSS----   | GS            | WGQGT                | TLTVSS               |                      |                      |                      |                      |                      |                      |                      |                      |                      |                      |                      |                      |                      |                      |                      |                      |                      |                      |                      |                      |                      |    |     |  |  |  |
| VH429               | EVQLVESGGTLVQPGGSLRLS          | CAASGFTFI | NYAMS          | WVRQAPDKGLDWVS      | TISN--NGGATYYADSVKG  | RFTISRDNNSNTLYLQMN  | SLRPDDTAVYYCAK | GPINTGRY--   | GD            | WGQGT                | TLTVSS               |                      |                      |                      |                      |                      |                      |                      |                      |                      |                      |                      |                      |                      |                      |                      |                      |                      |                      |                      |                      |                      |    |     |  |  |  |
| VH429 <sub>SS</sub> | EVQLVESGGTLVQPGGSLRLS          | CAASGFTFI | NYAMS          | WVRQAPDKGLDWVC      | TISN--NGGATYYADSVKG  | RFTISRDNNSNTLYLQMN  | SLRPDDTAVYYCAK | GPINTGRY--   | GD            | WGQGT                | TLTVSS               |                      |                      |                      |                      |                      |                      |                      |                      |                      |                      |                      |                      |                      |                      |                      |                      |                      |                      |                      |                      |                      |    |     |  |  |  |
| VHB82               | QVQLQESGGGLVQPGGSLRLS          | CAASGFTFS | SYAMS          | WVRQAPGKGLEWVS      | AISG--SGGSTYYADSVKG  | RFTISRDNNSKNTLYLQMN | SLRAEDTAVYYCGT | DMEV-----    |               | WGKGT                | TLTVSS               |                      |                      |                      |                      |                      |                      |                      |                      |                      |                      |                      |                      |                      |                      |                      |                      |                      |                      |                      |                      |                      |    |     |  |  |  |
| VHB82 <sub>SS</sub> | QVQLQESGGGLVQPGGSLRLS          | CAASGFTFS | SYAMS          | WVRQAPGKGLEWVC      | AISG--SGGSTYYADSVKG  | RFTISRDNNSKNTLYLQMN | SLRAEDTAVYYCGT | DMEV-----    |               | WGKGT                | TLTVSS               |                      |                      |                      |                      |                      |                      |                      |                      |                      |                      |                      |                      |                      |                      |                      |                      |                      |                      |                      |                      |                      |    |     |  |  |  |
| VHM81               | EVQLVQSGGGLVQPGSLRLS           | CAASGFTFD | DYAMH          | WVRQAPGKGLEWVS      | GISG--SGASTYYADSVKG  | RFTISRDNNSKNTLYLQMN | SLRAGDTALYYCAR | QSITGPTGAFDV |               | WGQGT                | MTVTVSS              |                      |                      |                      |                      |                      |                      |                      |                      |                      |                      |                      |                      |                      |                      |                      |                      |                      |                      |                      |                      |                      |    |     |  |  |  |
| VHM81 <sub>SS</sub> | EVQLVQSGGGLVQPGSLRLS           | CAASGFTFD | DYAMH          | WVRQAPGKGLEWVC      | GISG--SGASTYYADSVKG  | RFTISRDNNSKNTLYLQMN | SLRAGDTALYYCAR | QSITGPTGAFDV |               | WGQGT                | MTVTVSS              |                      |                      |                      |                      |                      |                      |                      |                      |                      |                      |                      |                      |                      |                      |                      |                      |                      |                      |                      |                      |                      |    |     |  |  |  |

|                     | CDR-L1 (L24-34)         |              |                 |                 |                         |                    |                                            |           |            |            |            | CDR-L2 (L50-56) |            |            |            |            |            |            |            |            |            |            | CDR-L3 (L89-97) |            |            |            |            |            |            |            |            |            |            |            |            |  |  |  |
|---------------------|-------------------------|--------------|-----------------|-----------------|-------------------------|--------------------|--------------------------------------------|-----------|------------|------------|------------|-----------------|------------|------------|------------|------------|------------|------------|------------|------------|------------|------------|-----------------|------------|------------|------------|------------|------------|------------|------------|------------|------------|------------|------------|------------|--|--|--|
|                     | FR1                     |              |                 | FR2             |                         |                    | FR3                                        |           |            | FR4        |            |                 | FR1        |            |            | FR2        |            |            | FR3        |            |            | FR4        |                 |            | FR1        |            |            | FR2        |            |            | FR3        |            |            | FR4        |            |  |  |  |
|                     | 1                       | 2            | 3               | 4               | 5                       | 6                  | 7                                          | 8         | 9          | 10         | 11         | 12              | 13         | 14         | 15         | 16         | 17         | 18         | 19         | 20         | 21         | 22         | 23              | 24         | 25         | 26         | 27         | 28         | 29         | 30         | 31         | 32         | 33         |            |            |  |  |  |
| VL382               | 12345678901234567890123 | 4567890a1234 | 567890123456789 | 0123456         | 78901234567890123456789 | 0123456            | 789012345678901234567890123456789012345678 | 901234567 | 8901234567 | 8901234567 | 8901234567 | 8901234567      | 8901234567 | 8901234567 | 8901234567 | 8901234567 | 8901234567 | 8901234567 | 8901234567 | 8901234567 | 8901234567 | 8901234567 | 8901234567      | 8901234567 | 8901234567 | 8901234567 | 8901234567 | 8901234567 | 8901234567 | 8901234567 | 8901234567 | 8901234567 | 8901234567 | 8901234567 | 8901234567 |  |  |  |
| VL382 <sub>SS</sub> | EIVMTQSPGTL             | SLSPGDRATLSC | RASQDIS-TYLA    | WYQKPGQAPRLLIY  | SASRRAT                 | GIPDRFSGSGGTDFTLT  | ISRLEPEDFAVYYC                             | QQYSSSPKT | FGQGT      | KVTIVL     |            |                 |            |            |            |            |            |            |            |            |            |            |                 |            |            |            |            |            |            |            |            |            |            |            |            |  |  |  |
| VL383               | ETTLTQSPGTL             | SLSPGERATLSC | RASQSVS-KNLA    | WYQKPGQSPRLLIH  | SISTRAT                 | GVPARFSGSGGTDFTLT  | ISRLEPEDFAVYYC                             | QQYGNPQT  | FGQGT      | KVEIK      |            |                 |            |            |            |            |            |            |            |            |            |            |                 |            |            |            |            |            |            |            |            |            |            |            |            |  |  |  |
| VL383 <sub>SS</sub> | ETTLTQSPGTL             | SLSPGERATLSC | RASQSVS-KNLA    | WYQKPGQSPRLLCH  | SISTRAT                 | GVPARFSCGSGGTDFTLT | ISRLEPEDFAVYYC                             | QQYGNPQT  | FGQGT      | KVEIK      |            |                 |            |            |            |            |            |            |            |            |            |            |                 |            |            |            |            |            |            |            |            |            |            |            |            |  |  |  |
| VL325               | EIVLTQSPPTL             | SLSPGERATLSC | RASQSVG-RYLA    | WYQKPGQAPRLLVF  | DTSNRAP                 | GVPARFSGRSGTLFTLT  | ISSLEPEDSAVYFC                             | QQYSSSPRT | FGHGT      | KVTIVL     |            |                 |            |            |            |            |            |            |            |            |            |            |                 |            |            |            |            |            |            |            |            |            |            |            |            |  |  |  |
| VL325 <sub>SS</sub> | EIVLTQSPPTL             | SLSPGERATLSC | RASQSVG-RYLA    | WYQKPGQAPRLLCF  | DTSNRAP                 | GVPARFSCRSGTLFTLT  | ISSLEPEDSAVYFC                             | QQYSSSPRT | FGQGT      | KVTIVL     |            |                 |            |            |            |            |            |            |            |            |            |            |                 |            |            |            |            |            |            |            |            |            |            |            |            |  |  |  |
| VL330               | DIQMTQSPFSL             | SAFVGDRTITC  | RASESVG-NLSL    | WYQLKPGKNPRLVLS | GGSFQVS                 | GVSARFSGSGAGTLFTLT | ITGLRLDSDATYYC                             | QQSDAVPRT | FGHGT      | KVSVL      |            |                 |            |            |            |            |            |            |            |            |            |            |                 |            |            |            |            |            |            |            |            |            |            |            |            |  |  |  |
| VL330 <sub>SS</sub> | DIQMTQSPFSL             | SAFVGDRTITC  | RASESVG-NLSL    | WYQLKPGKNPRLICS | GGSFQVS                 | GVSARFSCSGAGTLFTLT | ITGLRLDSDATYYC                             | QQSDAVPRT | FGHGT      | KVSVL      |            |                 |            |            |            |            |            |            |            |            |            |            |                 |            |            |            |            |            |            |            |            |            |            |            |            |  |  |  |
| VL335               | EIVMTQSPATL             | SLSPGERATLSC | RASQSVSSSLA     | WYQKPGQAPRLLIY  | GTSNRAT                 | GIPDRFSGSGGTHFTLT  | INRLEPGDFAVYYC                             | QQYSSSPRT | FGQGT      | KVTIVL     |            |                 |            |            |            |            |            |            |            |            |            |            |                 |            |            |            |            |            |            |            |            |            |            |            |            |  |  |  |
| VL335 <sub>SS</sub> | EIVMTQSPATL             | SLSPGERATLSC | RASQSVSSSLA     | WYQKPGQAPRLLICY | GTSNRAT                 | GIPDRFSCSGGTHFTLT  | INRLEPGDFAVYYC                             | QQYSSSPRT | FGQGT      | KVTIVL     |            |                 |            |            |            |            |            |            |            |            |            |            |                 |            |            |            |            |            |            |            |            |            |            |            |            |  |  |  |

**Supplementary Figure S1.** Full-length amino acid sequences of human autonomous V<sub>H</sub>/V<sub>L</sub> sdAb scaffolds used in this study. Numbering is according to Kabat.



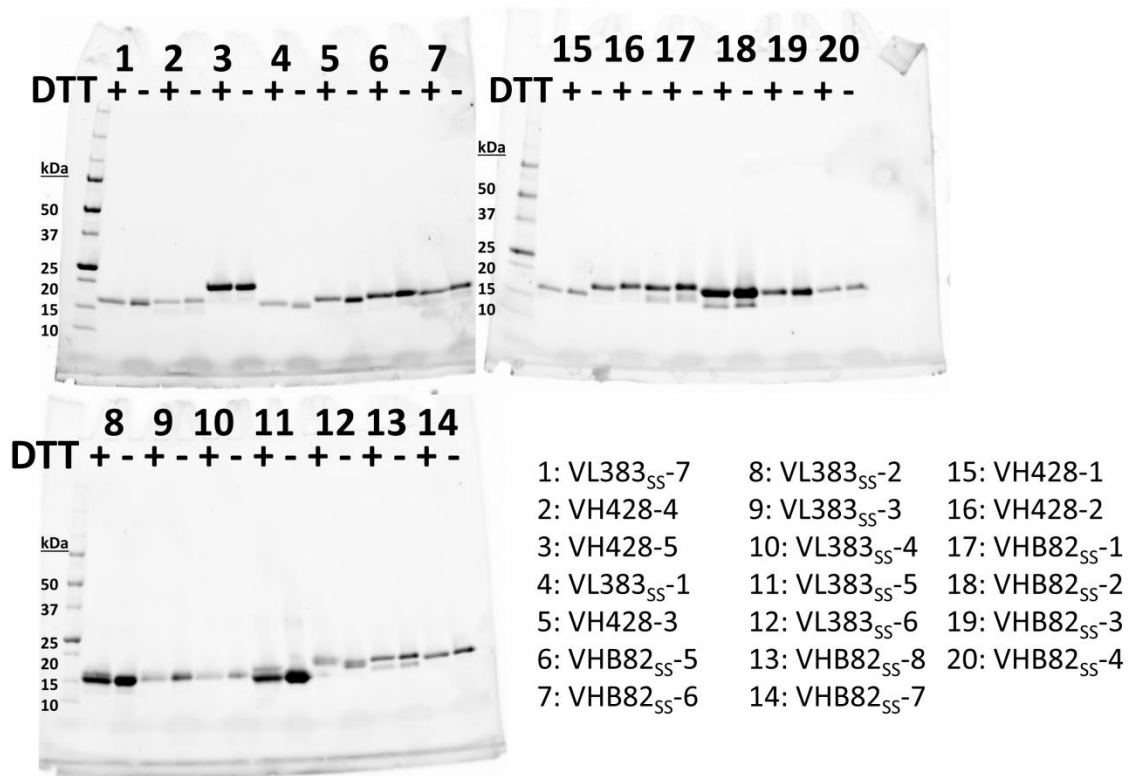

**Supplementary Figure S3.** SDS-PAGE in reducing and non-reducing conditions of all antigen-specific sdAbs isolated from the VL383<sub>SS</sub>, VH428 and VHB82<sub>SS</sub> synthetic human V<sub>H</sub>/V<sub>L</sub> sdAb libraries. 1-5 µg of each IMAC-purified sdAb was electrophoresed in a Mini-PROTEAN<sup>®</sup> TGX stain-free gel (Bio-Rad); the loading buffer for the samples contained 40 mM Tris, pH 6.8, 6% (v/v) glycerol, 2% (w/v) SDS and 0.05% (w/v) bromophenol blue. DTT was added to some samples at 15 mM (+ DTT). Molecular weight marker is Bio-Rad Precision Plus Protein<sup>™</sup> Unstained Protein Standards, Cat. #1610363.

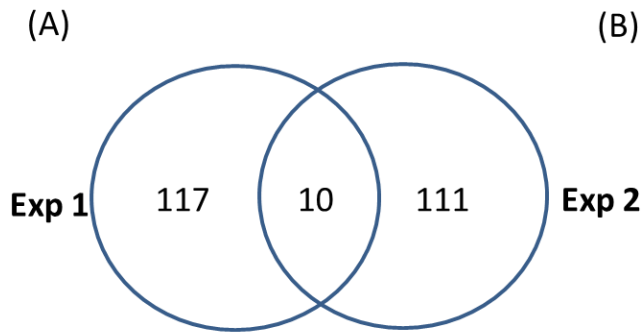

VHB82<sub>SS</sub>, Helper Phage Rescue,  
3 rounds protA selection +  
amplification in *E. coli*, unique  
sdAbs found at  $\geq 6$  copies

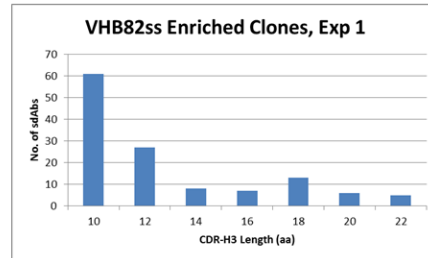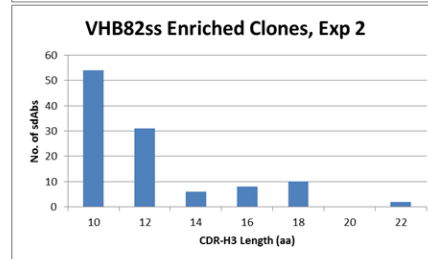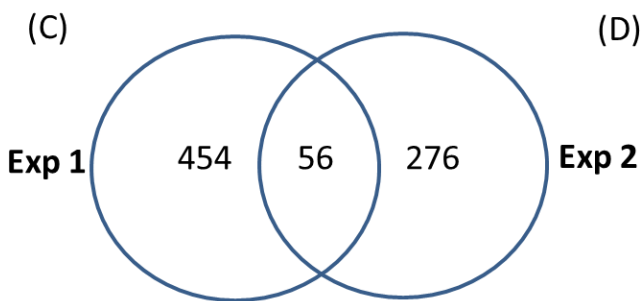

VL383<sub>SS</sub>, Helper Phage Rescue,  
3 rounds protL selection +  
amplification in *E. coli*, unique  
sdAbs found at  $\geq 10$  copies

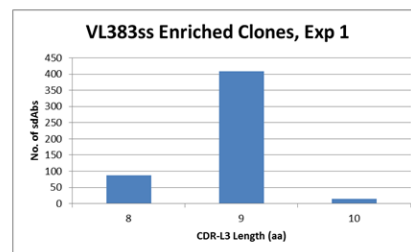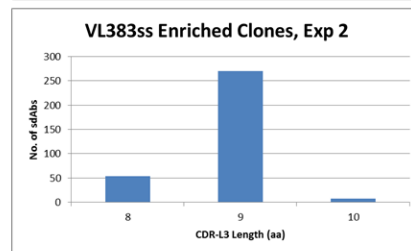

**Supplementary Figure S4.** Properties of human  $V_H$  and  $V_L$  sdAbs enriched by stability selection. (A) Overlap of unique  $V_H$  sdAbs enriched from the VHB82<sub>SS</sub> library by replicate stability selection. (B) CDR-H3 length distribution of unique  $V_H$  sdAbs enriched from the VHB82<sub>SS</sub> library by replicate stability selection. (C) Overlap of unique  $V_L$  sdAbs enriched from the VL383<sub>SS</sub> library by replicate stability selection. (D) CDR-L3 length distribution of unique  $V_L$  sdAbs enriched from the VL383<sub>SS</sub> library by replicate stability selection.

| VL383 <sub>ss</sub> Randomization Position, Helper Phase Rescue, 3 Rounds of Stability Selection, REPLICATE 1 |         |         |         |         |         |         |          |          |         |         |         |         |      |
|---------------------------------------------------------------------------------------------------------------|---------|---------|---------|---------|---------|---------|----------|----------|---------|---------|---------|---------|------|
|                                                                                                               | CDR-L1  |         |         |         | CDR-L2  |         |          |          | CDR-L3  |         |         |         |      |
|                                                                                                               | 36 (X1) | 37 (X1) | 38 (X1) | 57 (X1) | 66 (X1) | 68 (X1) | 107 (X1) | 108 (X2) | 109(X2) | 113(X2) | 114(X2) | 116(X2) |      |
| *                                                                                                             | 0.6     | 1.6     | 1.2     | 0.0     | 0.0     | 0.0     | 0.0      | 0.0      | 0.0     | 0.0     | 0.0     | 11.4    | 0.0  |
| A                                                                                                             | 16.3    | 5.9     | 9.6     | 35.3    | 10.8    | 13.1    | 3.9      | 14.5     | 13.2    | 7.1     | 0.0     | 0.0     | 9.0  |
| C                                                                                                             | 0.0     | 0.0     | 0.0     | 0.0     | 0.0     | 0.0     | 0.0      | 0.0      | 0.0     | 0.0     | 0.0     | 0.0     | 0.0  |
| D                                                                                                             | 44.1    | 28.8    | 25.5    | 7.3     | 15.7    | 24.3    | 12.2     | 7.5      | 10.6    | 14.3    | 5.5     | 2.5     | 2.5  |
| E                                                                                                             | 0.0     | 0.0     | 0.0     | 0.0     | 0.0     | 0.0     | 0.2      | 10.6     | 12.8    | 7.1     | 17.6    | 8.8     | 8.8  |
| F                                                                                                             | 1.2     | 0.2     | 0.6     | 0.4     | 1.0     | 0.6     | 2.7      | 2.5      | 4.5     | 14.3    | 2.2     | 2.4     | 2.4  |
| G                                                                                                             | 0.0     | 0.0     | 0.0     | 0.0     | 0.2     | 3.5     | 0.4      | 4.5      | 2.8     | 14.3    | 5.5     | 3.9     | 3.9  |
| H                                                                                                             | 10.2    | 21.0    | 26.1    | 1.0     | 19.8    | 17.5    | 11.6     | 12.2     | 7.1     | 0.0     | 8.0     | 10.4    | 10.4 |
| I                                                                                                             | 0.2     | 1.0     | 0.0     | 6.7     | 12.7    | 1.6     | 1.2      | 1.0      | 1.9     | 0.0     | 1.8     | 1.4     | 1.4  |
| K                                                                                                             | 0.0     | 0.0     | 0.0     | 0.0     | 0.0     | 0.0     | 0.2      | 5.9      | 2.4     | 0.0     | 5.3     | 2.9     | 2.9  |
| L                                                                                                             | 1.0     | 1.0     | 0.0     | 5.9     | 0.6     | 6.7     | 1.8      | 0.8      | 1.0     | 0.9     | 7.1     | 2.0     | 0.0  |
| M                                                                                                             | 0.0     | 0.0     | 0.0     | 0.0     | 0.0     | 0.0     | 0.0      | 0.0      | 0.0     | 0.0     | 0.0     | 0.0     | 0.0  |
| N                                                                                                             | 0.0     | 0.0     | 0.2     | 0.0     | 0.0     | 0.0     | 0.0      | 0.0      | 0.0     | 0.0     | 0.0     | 0.0     | 0.0  |
| P                                                                                                             | 4.3     | 6.5     | 1.4     | 16.9    | 0.4     | 22.2    | 3.7      | 0.8      | 1.2     | 14.3    | 6.5     | 11.4    | 11.4 |
| Q                                                                                                             | 0.0     | 0.0     | 0.0     | 0.0     | 0.0     | 0.0     | 0.8      | 8.8      | 6.6     | 7.1     | 5.7     | 2.4     | 2.4  |
| R                                                                                                             | 0.0     | 0.2     | 0.0     | 0.0     | 3.5     | 0.0     | 0.0      | 3.9      | 1.9     | 0.0     | 2.9     | 0.4     | 0.4  |
| S                                                                                                             | 11.4    | 12.4    | 19.2    | 18.6    | 7.1     | 9.4     | 16.7     | 6.3      | 10.4    | 0.0     | 3.9     | 9.8     | 9.8  |
| T                                                                                                             | 5.3     | 18.8    | 2.9     | 6.3     | 11.8    | 2.0     | 8.8      | 2.5      | 9.0     | 7.1     | 4.7     | 3.3     | 3.3  |
| V                                                                                                             | 0.8     | 1.0     | 0.0     | 6.5     | 6.1     | 1.2     | 1.6      | 0.6      | 1.9     | 0.0     | 2.7     | 5.3     | 5.3  |
| W                                                                                                             | 0.0     | 0.0     | 0.0     | 0.0     | 0.0     | 0.0     | 0.0      | 2.4      | 1.9     | 0.0     | 4.7     | 5.5     | 5.5  |
| Y                                                                                                             | 4.7     | 2.7     | 7.5     | 0.6     | 4.3     | 2.9     | 35.3     | 15.1     | 10.9    | 7.1     | 9.6     | 20.6    | 20.6 |

  

| VL383 <sub>ss</sub> Randomization Position, Helper Phase Rescue, 3 Rounds of Stability Selection, REPLICATE 2 |         |         |         |         |         |         |          |          |         |         |         |         |      |
|---------------------------------------------------------------------------------------------------------------|---------|---------|---------|---------|---------|---------|----------|----------|---------|---------|---------|---------|------|
|                                                                                                               | CDR-L1  |         |         |         | CDR-L2  |         |          |          | CDR-L3  |         |         |         |      |
|                                                                                                               | 36 (X1) | 37 (X1) | 38 (X1) | 57 (X1) | 66 (X1) | 68 (X1) | 107 (X1) | 108 (X2) | 109(X2) | 113(X2) | 114(X2) | 116(X2) |      |
| *                                                                                                             | 0.3     | 1.8     | 0.9     | 0.0     | 0.3     | 0.0     | 0.0      | 0.0      | 0.0     | 0.0     | 0.0     | 0.0     | 0.0  |
| A                                                                                                             | 15.4    | 8.1     | 9.9     | 38.9    | 11.4    | 14.5    | 4.5      | 15.7     | 10.8    | 12.5    | 10.2    | 9.3     | 9.3  |
| C                                                                                                             | 0.0     | 0.0     | 0.0     | 0.0     | 0.0     | 0.0     | 0.0      | 0.0      | 0.0     | 0.0     | 0.0     | 0.0     | 0.0  |
| D                                                                                                             | 46.4    | 27.4    | 26.5    | 6.9     | 19.0    | 27.1    | 12.3     | 6.0      | 7.9     | 25.0    | 6.0     | 3.6     | 3.6  |
| E                                                                                                             | 0.0     | 0.0     | 0.0     | 0.0     | 0.0     | 0.0     | 0.0      | 11.7     | 18.0    | 12.5    | 17.5    | 7.2     | 7.2  |
| F                                                                                                             | 1.8     | 0.3     | 0.9     | 0.3     | 0.6     | 0.6     | 2.7      | 3.0      | 5.0     | 12.5    | 2.4     | 2.1     | 2.1  |
| G                                                                                                             | 0.0     | 0.0     | 0.0     | 0.0     | 0.3     | 3.3     | 0.3      | 3.3      | 3.6     | 0.0     | 3.9     | 4.5     | 4.5  |
| H                                                                                                             | 9.6     | 19.0    | 27.4    | 0.3     | 17.8    | 16.6    | 11.1     | 13.9     | 8.3     | 0.0     | 6.3     | 9.0     | 9.0  |
| I                                                                                                             | 0.3     | 1.2     | 0.0     | 6.6     | 10.8    | 1.5     | 1.2      | 0.9      | 2.2     | 0.0     | 2.1     | 1.2     | 1.2  |
| K                                                                                                             | 0.0     | 0.0     | 0.0     | 0.0     | 0.0     | 0.0     | 0.3      | 5.7      | 1.1     | 0.0     | 6.9     | 3.3     | 3.3  |
| L                                                                                                             | 0.9     | 0.3     | 4.8     | 0.9     | 8.1     | 1.5     | 0.9      | 1.8      | 0.7     | 12.5    | 2.1     | 0.0     | 0.0  |
| M                                                                                                             | 0.0     | 0.0     | 0.0     | 0.0     | 0.0     | 0.0     | 0.0      | 0.0      | 0.0     | 0.0     | 0.0     | 0.0     | 0.0  |
| N                                                                                                             | 0.0     | 0.0     | 0.3     | 0.0     | 0.0     | 0.0     | 0.0      | 0.0      | 0.0     | 0.0     | 0.0     | 0.0     | 0.0  |
| P                                                                                                             | 6.3     | 6.6     | 1.5     | 16.0    | 0.9     | 20.2    | 3.3      | 0.3      | 0.7     | 0.0     | 7.5     | 10.8    | 10.8 |
| Q                                                                                                             | 0.0     | 0.0     | 0.0     | 0.0     | 0.0     | 0.0     | 0.3      | 8.4      | 6.8     | 12.5    | 8.4     | 2.7     | 2.7  |
| R                                                                                                             | 0.0     | 0.0     | 0.0     | 0.0     | 3.3     | 0.0     | 0.0      | 3.9      | 2.5     | 0.0     | 3.3     | 0.6     | 0.6  |
| S                                                                                                             | 8.7     | 13.0    | 19.0    | 15.4    | 5.4     | 8.7     | 15.4     | 6.0      | 10.1    | 0.0     | 4.5     | 10.8    | 10.8 |
| T                                                                                                             | 6.3     | 17.5    | 2.7     | 8.1     | 12.7    | 1.2     | 9.9      | 2.4      | 7.9     | 0.0     | 3.6     | 4.5     | 4.5  |
| V                                                                                                             | 1.2     | 1.2     | 0.0     | 6.3     | 6.3     | 1.8     | 1.8      | 0.6      | 1.1     | 0.0     | 2.7     | 4.2     | 4.2  |
| W                                                                                                             | 0.0     | 0.0     | 0.0     | 0.0     | 0.0     | 0.0     | 0.0      | 2.1      | 2.2     | 0.0     | 4.2     | 5.7     | 5.7  |
| Y                                                                                                             | 2.7     | 3.6     | 6.0     | 0.3     | 3.0     | 3.0     | 35.8     | 14.2     | 11.2    | 12.5    | 8.1     | 20.2    | 20.2 |

**Supplementary Figure S5.** Amino acid representation at each randomization position in VL sdAb clones ( $n_1=510$  and  $n_2=332$ ) enriched from the VL383<sub>ss</sub> library by replicate stability selection. Asterisks denote stop codons.



| VL3835S Randomization Position, Helper Phase Rescue, 3 Rounds of Stability Selection, REPLICATE 1 |         |         |         |         |         |         |          |          |          |          |          |          |      |
|---------------------------------------------------------------------------------------------------|---------|---------|---------|---------|---------|---------|----------|----------|----------|----------|----------|----------|------|
|                                                                                                   | CDR-L1  |         |         | CDR-L2  |         |         | CDR-L3   |          |          | CDR-L3   |          |          |      |
|                                                                                                   | 36 (X1) | 37 (X1) | 38 (X1) | 57 (X1) | 66 (X1) | 68 (X1) | 107 (X1) | 108 (X2) | 109 (X2) | 113 (X2) | 114 (X2) | 116 (X2) |      |
| *                                                                                                 | 0.4     | 1.0     | 0.5     | 0.1     | 0.1     | 0.0     | 0.0      | 0.0      | 0.0      | 0.0      | 0.0      | 0.0      | 0.0  |
| A                                                                                                 | 18.6    | 8.0     | 10.9    | 34.2    | 10.4    | 12.8    | 7.3      | 12.8     | 9.7      | 10.3     | 9.4      | 9.4      | 9.5  |
| C                                                                                                 | 0.0     | 0.0     | 0.0     | 0.1     | 0.0     | 0.0     | 0.0      | 0.0      | 0.0      | 0.0      | 0.0      | 0.0      | 0.0  |
| D                                                                                                 | 37.3    | 25.8    | 22.2    | 9.5     | 19.9    | 27.0    | 16.0     | 8.4      | 10.1     | 9.0      | 6.5      | 4.2      | 4.2  |
| E                                                                                                 | 0.0     | 0.0     | 0.0     | 0.0     | 0.0     | 0.0     | 0.0      | 0.3      | 11.5     | 14.3     | 12.7     | 16.7     | 10.0 |
| F                                                                                                 | 1.4     | 0.6     | 1.0     | 0.8     | 1.5     | 1.6     | 3.3      | 2.8      | 3.8      | 3.7      | 2.9      | 3.7      | 3.7  |
| G                                                                                                 | 0.3     | 0.1     | 0.1     | 0.0     | 0.1     | 1.7     | 0.2      | 5.8      | 4.1      | 8.4      | 4.9      | 5.2      | 5.2  |
| H                                                                                                 | 11.0    | 18.4    | 25.2    | 2.4     | 16.1    | 13.5    | 9.8      | 11.5     | 7.6      | 6.6      | 7.1      | 7.8      | 7.8  |
| I                                                                                                 | 1.1     | 0.9     | 0.3     | 6.8     | 8.9     | 3.1     | 1.8      | 2.2      | 2.7      | 3.1      | 3.0      | 3.3      | 3.3  |
| K                                                                                                 | 0.0     | 0.0     | 0.0     | 0.0     | 0.0     | 0.0     | 0.1      | 4.8      | 2.6      | 3.6      | 5.7      | 3.0      | 3.0  |
| L                                                                                                 | 1.2     | 0.7     | 5.1     | 1.9     | 9.4     | 2.4     | 2.2      | 2.2      | 1.4      | 2.9      | 1.9      | 0.2      | 0.2  |
| M                                                                                                 | 0.0     | 0.0     | 0.0     | 0.0     | 0.0     | 0.0     | 0.0      | 0.0      | 0.0      | 0.0      | 0.0      | 0.0      | 0.0  |
| N                                                                                                 | 0.0     | 0.0     | 0.1     | 0.0     | 0.0     | 0.0     | 0.0      | 0.0      | 0.0      | 0.0      | 0.0      | 0.0      | 0.0  |
| P                                                                                                 | 6.0     | 6.7     | 3.3     | 17.2    | 3.2     | 18.9    | 6.1      | 2.7      | 3.3      | 8.4      | 7.6      | 9.9      | 9.9  |
| Q                                                                                                 | 0.0     | 0.0     | 0.0     | 0.0     | 0.0     | 0.0     | 0.6      | 6.9      | 6.4      | 6.5      | 6.3      | 3.3      | 3.3  |
| R                                                                                                 | 0.0     | 0.1     | 0.1     | 0.0     | 1.7     | 0.1     | 0.1      | 3.0      | 2.4      | 2.8      | 3.1      | 1.5      | 1.5  |
| S                                                                                                 | 10.4    | 12.3    | 19.0    | 12.1    | 6.5     | 9.7     | 13.7     | 5.7      | 8.5      | 5.2      | 4.7      | 8.2      | 8.2  |
| T                                                                                                 | 4.7     | 20.0    | 4.9     | 6.6     | 11.6    | 1.9     | 8.5      | 3.7      | 9.7      | 4.6      | 4.7      | 5.3      | 5.3  |
| V                                                                                                 | 2.2     | 1.3     | 0.4     | 6.4     | 5.8     | 2.2     | 1.8      | 1.4      | 1.7      | 2.1      | 2.1      | 3.9      | 3.9  |
| W                                                                                                 | 0.0     | 0.0     | 0.0     | 0.0     | 0.0     | 0.0     | 0.1      | 3.6      | 3.0      | 4.3      | 4.5      | 6.0      | 6.0  |
| Y                                                                                                 | 5.2     | 3.9     | 6.9     | 1.8     | 4.7     | 4.9     | 28.1     | 10.9     | 8.4      | 5.8      | 8.9      | 14.9     | 14.9 |

  

| VL3835S Randomization Position, Helper Phase Rescue, 3 Rounds of Stability Selection, REPLICATE 2 |         |         |         |         |         |         |          |          |          |          |          |          |      |
|---------------------------------------------------------------------------------------------------|---------|---------|---------|---------|---------|---------|----------|----------|----------|----------|----------|----------|------|
|                                                                                                   | CDR-L1  |         |         | CDR-L2  |         |         | CDR-L3   |          |          | CDR-L3   |          |          |      |
|                                                                                                   | 36 (X1) | 37 (X1) | 38 (X1) | 57 (X1) | 66 (X1) | 68 (X1) | 107 (X1) | 108 (X2) | 109 (X2) | 113 (X2) | 114 (X2) | 116 (X2) |      |
| *                                                                                                 | 0.4     | 0.9     | 0.4     | 0.1     | 0.1     | 0.0     | 0.0      | 0.0      | 0.0      | 0.0      | 0.0      | 0.0      | 0.0  |
| A                                                                                                 | 18.0    | 8.2     | 11.5    | 34.1    | 10.6    | 12.8    | 7.4      | 12.5     | 8.8      | 9.7      | 9.0      | 9.4      | 9.4  |
| C                                                                                                 | 0.0     | 0.0     | 0.1     | 0.1     | 0.0     | 0.0     | 0.0      | 0.0      | 0.0      | 0.0      | 0.0      | 0.0      | 0.0  |
| D                                                                                                 | 37.9    | 27.0    | 23.3    | 9.5     | 20.4    | 27.5    | 16.4     | 8.3      | 10.5     | 9.0      | 6.7      | 4.4      | 4.4  |
| E                                                                                                 | 0.0     | 0.0     | 0.0     | 0.0     | 0.0     | 0.0     | 0.3      | 11.8     | 14.7     | 12.6     | 16.9     | 10.0     | 10.0 |
| F                                                                                                 | 1.4     | 0.6     | 1.1     | 0.9     | 1.6     | 1.7     | 3.5      | 2.8      | 3.6      | 3.1      | 3.0      | 3.8      | 3.8  |
| G                                                                                                 | 0.3     | 0.1     | 0.1     | 0.0     | 0.1     | 1.7     | 0.2      | 6.0      | 4.2      | 8.4      | 4.6      | 5.4      | 5.4  |
| H                                                                                                 | 11.2    | 18.4    | 25.0    | 2.6     | 15.4    | 13.0    | 9.5      | 11.5     | 7.7      | 6.7      | 7.1      | 7.5      | 7.5  |
| I                                                                                                 | 1.2     | 0.9     | 0.4     | 6.9     | 8.3     | 3.1     | 1.9      | 2.3      | 2.8      | 3.0      | 3.1      | 3.4      | 3.4  |
| K                                                                                                 | 0.0     | 0.0     | 0.0     | 0.0     | 0.0     | 0.0     | 0.1      | 4.8      | 2.6      | 4.0      | 5.5      | 3.1      | 3.1  |
| L                                                                                                 | 1.3     | 0.8     | 4.4     | 2.0     | 9.6     | 2.4     | 2.2      | 2.2      | 1.6      | 3.0      | 2.0      | 0.2      | 0.2  |
| M                                                                                                 | 0.0     | 0.0     | 0.0     | 0.0     | 0.0     | 0.0     | 0.0      | 0.0      | 0.0      | 0.0      | 0.0      | 0.0      | 0.0  |
| N                                                                                                 | 0.0     | 0.0     | 0.1     | 0.0     | 0.0     | 0.0     | 0.0      | 0.0      | 0.0      | 0.0      | 0.0      | 0.0      | 0.0  |
| P                                                                                                 | 5.7     | 6.8     | 3.3     | 17.4    | 3.5     | 18.4    | 6.1      | 2.9      | 3.4      | 9.0      | 7.8      | 10.0     | 10.0 |
| Q                                                                                                 | 0.0     | 0.0     | 0.0     | 0.0     | 0.0     | 0.0     | 0.5      | 6.8      | 6.5      | 6.4      | 6.3      | 3.4      | 3.4  |
| R                                                                                                 | 0.0     | 0.1     | 0.1     | 0.0     | 1.6     | 0.1     | 0.1      | 3.0      | 2.4      | 2.9      | 3.1      | 1.7      | 1.7  |
| S                                                                                                 | 10.2    | 12.1    | 18.4    | 11.3    | 6.9     | 9.7     | 13.2     | 5.6      | 8.1      | 5.3      | 4.9      | 8.3      | 8.3  |
| T                                                                                                 | 4.6     | 18.5    | 4.6     | 6.5     | 11.6    | 2.0     | 8.8      | 3.8      | 9.5      | 4.6      | 4.7      | 5.5      | 5.5  |
| V                                                                                                 | 2.3     | 1.3     | 0.3     | 6.5     | 5.8     | 2.3     | 1.8      | 1.4      | 1.8      | 1.9      | 2.1      | 3.3      | 3.3  |
| W                                                                                                 | 0.0     | 0.0     | 0.0     | 0.0     | 0.0     | 0.0     | 0.1      | 3.8      | 3.2      | 4.4      | 4.5      | 6.2      | 6.2  |
| Y                                                                                                 | 5.3     | 4.1     | 6.9     | 2.0     | 4.6     | 5.1     | 27.9     | 10.5     | 8.5      | 5.8      | 8.6      | 14.3     | 14.3 |

**Supplementary Figure S7.** Amino acid representation at each randomization position in all VL sdAbs present after three rounds of replicate stability selection of the VL383ss library. Asterisks denote stop codons.





**Supplementary Table SI.** Sequences of oligonucleotide primers used in this study.

| <b>Name</b> | <b>Sequence (5'→3')</b>                                         | <b>Purpose</b>                         |
|-------------|-----------------------------------------------------------------|----------------------------------------|
| M13F        | TTG TAA AAC GAC GGC CAG                                         | PCR Amplification of assembled library |
| M13R        | GGA AAC AGC TAT GAC CAT G                                       | PCR Amplification of assembled library |
| -96GIII     | CCC TCA TAG TTA GCG TAA CGA TCT                                 | Colony-PCR Sequencing                  |
| fdTGIII     | GTG AAA AAA TTA TTA TTC GCA ATT CCT                             | Colony-PCR Sequencing                  |
| seqF-428    | CGC TCT TCC GAT CTC TG NNNNN CAG CTG CAG<br>CTG CAG GAG TCG GGG | NGS                                    |
| seqF-B82S   | CGC TCT TCC GAT CTC TG NNNNN CAG GTG CAG<br>CTG CAG GAG TCG GGG | NGS                                    |
| seqF-383S   | CGC TCT TCC GAT CTC TG NNNNN GAA ACG ACA<br>CTC ACG CAG TCT CCA | NGS                                    |
| seqR-428    | TGC TCT TCC GAT CTG AC NNNNN TGA GGA GAC<br>GGT GAC TAG TGT TCC | NGS                                    |
| seqR-B82s   | TGC TCT TCC GAT CTG AC NNNNN TGA AGA GAC<br>GGT GAC CGT GGT ACC | NGS                                    |
| seqR-383S   | TGC TCT TCC GAT CTG AC NNNNN TTT GAT CTC<br>CAC CTT GGT CCC CTG | NGS                                    |

**Supplementary Table SII.** Expression yields from overnight *E. coli* TG1 cultures,  $T_m$ s and solubility profiles of potential human  $V_H$  sdAb scaffolds considered for use in this study.

| $V_H$ sdAb scaffold       | Disulfide Linkages (IMGT numbering) | Expression Yield (mg/L) | $T_m$ (° C) | Monomer (%)   |
|---------------------------|-------------------------------------|-------------------------|-------------|---------------|
| VH44                      | 23-104                              | 8.2                     | 64.2        | >95           |
| VH44 <sub>SS</sub>        | 23-104, 54-78                       | 2.0                     | 74.5        | 72.3          |
| <b>VHB82</b>              | <b>23-104</b>                       | <b>12.8</b>             | <b>57.9</b> | <b>&gt;95</b> |
| <b>VHB82<sub>SS</sub></b> | <b>23-104, 54-78</b>                | <b>15.6</b>             | <b>72.9</b> | <b>80.8</b>   |
| VH419                     | 23-104                              | 3.4                     | 56.9        | >95           |
| VH419 <sub>SS</sub>       | 23-104, 54-78                       | 0.6                     | 67.4        | >95           |
| <b>VH429</b>              | <b>23-104</b>                       | <b>3.4</b>              | <b>58.5</b> | <b>&gt;95</b> |
| <b>VH429<sub>SS</sub></b> | <b>23-104, 54-78</b>                | <b>16.0</b>             | <b>71.8</b> | <b>&gt;95</b> |
| VHM41                     | 23-104                              | 1.8                     | 60.8        | >95           |
| VHM41 <sub>SS</sub>       | 23-104, 54-78                       | 2.1                     | 72.2        | 63.7          |
| <b>VHM81</b>              | <b>23-104</b>                       | <b>32.8</b>             | <b>66.9</b> | <b>&gt;95</b> |
| <b>VHM81<sub>SS</sub></b> | <b>23-104, 54-78</b>                | <b>1.9</b>              | <b>76.8</b> | <b>85.0</b>   |
| <b>VH428</b>              | <b>23-104</b>                       | <b>40.0</b>             | <b>62.3</b> | <b>&gt;95</b> |
| <b>VH428<sub>SS</sub></b> | <b>23-104, 54-78</b>                | <b>9.6</b>              | <b>73.1</b> | <b>&gt;95</b> |
| <b>VH420</b>              | <b>23-104</b>                       | <b>8.1</b>              | <b>57.8</b> | <b>&gt;95</b> |
| <b>VH420<sub>SS</sub></b> | <b>23-104, 54-78</b>                | <b>33.6</b>             | <b>67.3</b> | <b>&gt;95</b> |
| VH414                     | 23-104                              | 11.8                    | 55.3        | >95           |
| VH414 <sub>SS</sub>       | 23-104, 54-78                       | nd                      | 64.7        | >95           |
| VH423                     | 23-104                              | 2.4                     | 55.0        | >95           |
| VH423 <sub>SS</sub>       | 23-104, 54-78                       | nd                      | 70.7        | >95           |
| VH413                     | 23-104                              | 5.8                     | 54.2        | >95           |
| VH413 <sub>SS</sub>       | 23-104, 54-78                       | <0.1                    | nd          | nd            |

nd, not determined

$V_H$  sdAb scaffolds in bold red font were selected for CDR-shuffling experiments.

**Supplementary Table SIII.** Expression yields from overnight *E. coli* TG1 cultures,  $T_m$ s and solubility profiles of potential human V<sub>L</sub> sdAb scaffolds considered for use in this study.

| V <sub>L</sub> sdAb scaffold | Disulfide Linkages (IMGT numbering) | Expression Yield (mg/L) | $T_m$ (° C) | Monomer (%)   |
|------------------------------|-------------------------------------|-------------------------|-------------|---------------|
| VL324                        | 23-104                              | 2.5 – 7.0               | 66.1        | >95           |
| VL324 <sub>SS</sub>          | 23-104, 54-78                       | 0.5 – 1.1               | 73.4        | >95           |
| <b>VL325</b>                 | <b>23-104</b>                       | <b>34.8</b>             | <b>68.5</b> | <b>&gt;95</b> |
| <b>VL325<sub>SS</sub></b>    | <b>23-104, 54-78</b>                | <b>39.0</b>             | <b>82.5</b> | <b>&gt;95</b> |
| <b>VL335</b>                 | <b>23-104</b>                       | <b>36.4</b>             | <b>61.7</b> | <b>&gt;95</b> |
| <b>VL335<sub>SS</sub></b>    | <b>23-104, 54-78</b>                | <b>33.8</b>             | <b>79.0</b> | <b>&gt;95</b> |
| VL342                        | 23-104                              | 1.0 – 7.7               | 58.4        | >95           |
| VL342 <sub>SS</sub>          | 23-104, 54-78                       | 1.7 - 10.8              | 63.8        | >95           |
| VL364                        | 23-104                              | 0.3 – 77.0              | 57.0        | >95           |
| VL364 <sub>SS</sub>          | 23-104, 54-78                       | 4.7                     | 72.3        | >95           |
| VL389                        | 23-104                              | 3.0 – 16.7              | 51.9        | >95           |
| VL389 <sub>SS</sub>          | 23-104, 54-78                       | 6.5                     | 66.3        | >95           |
| <b>VL383</b>                 | <b>23-104</b>                       | <b>6.8</b>              | <b>57.3</b> | <b>&gt;95</b> |
| <b>VL383<sub>SS</sub></b>    | <b>23-104, 54-78</b>                | <b>47.0</b>             | <b>73.8</b> | <b>85.3</b>   |
| <b>VL382</b>                 | <b>23-104</b>                       | <b>2.9</b>              | <b>70.1</b> | <b>&gt;95</b> |
| <b>VL382<sub>SS</sub></b>    | <b>23-104, 54-78</b>                | <b>22.8</b>             | <b>83.3</b> | <b>&gt;95</b> |
| <b>VL330</b>                 | <b>23-104</b>                       | <b>1.8</b>              | <b>62.8</b> | <b>&gt;95</b> |
| <b>VL330<sub>SS</sub></b>    | <b>23-104, 54-78</b>                | <b>16.3</b>             | <b>83.7</b> | <b>&gt;95</b> |

nd, not determined

V<sub>L</sub> sdAb scaffolds in bold red font were selected for CDR-shuffling experiments.
